# Supplementary material for: Efficient deep-blue emitters comprised of an anthracene core and terminal bifunctional groups for nondoped electroluminescence
Source: Royal Society of Chemistry journal article supplement (doi:10.1039/c1jm10465a), 2011-01-01
Supplement: c1jm10465a.pdf [file c1jm10465a.pdf]

## Electronic Supplementary Information

# Efficient Deep-Blue Emitters Comprised of Anthracene Core and Terminal Bifunctional Groups for Nondoped Electroluminescence

Minrong Zhu,<sup>a</sup> Qiang Wang,<sup>b</sup> Yu Gu,<sup>a</sup> Xiaosong Cao,<sup>a</sup> Cheng Zhong,<sup>a</sup> Dongge Ma,<sup>\*b</sup> Jingui Qin<sup>a</sup> and  
Chuluo Yang<sup>\*a</sup>

<sup>a</sup> Department of Chemistry, Hubei Key Lab on Organic and Polymeric Optoelectronic Materials,  
Wuhan University, Wuhan 430072, People's Republic of China

<sup>b</sup> State Key Laboratory of Polymer Physics and Chemistry, Changchun Institute of Applied Chemistry,  
Chinese Academy of Sciences, Changchun 130022, People's Republic of China

\* To whom correspondence should be addressed. Email: clyang@whu.edu.cn; mdg1014@ciac.jl.cn

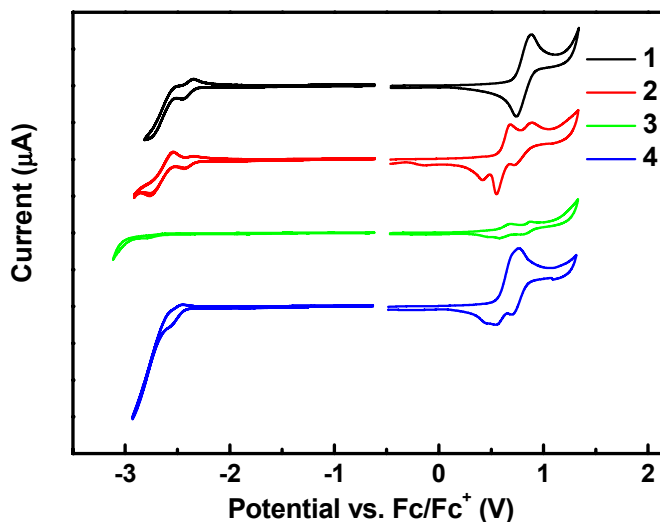

**Figure S1.** Cyclic voltammograms of **1-4** in  $\text{CH}_2\text{Cl}_2$  for oxidation and THF for reduction.

**Synthesis:** 9-(3-bromophenyl)-3,6-di-*tert*-butyl-9*H*-carbazole (**5a**), 3-bromo-*N,N*-diphenylaniline (**6a**) and 4-bromo-*N,N*-diphenylaniline (**7a**) were prepared according to the literature procedure.<sup>1-3</sup> 3-bromobenzoyl chloride was freshly prepared by refluxing corresponding benzoyl acid with  $\text{SOCl}_2$  and used immediately after distillation of excess  $\text{SOCl}_2$ .

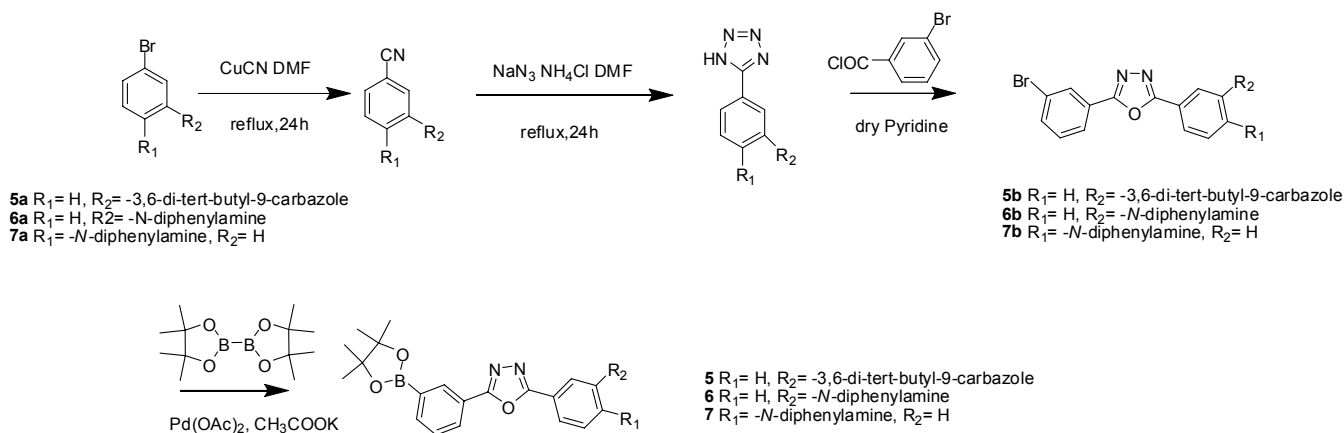

### Scheme S1. Synthetic routes of oxadiazole-containing arylboronic ester.

#### General procedure for the synthesis of oxadiazole-containing arylboronic ester.

A mixture of bromide end-capping groups (**5a**, **6a** or **7a**) (20 mmol) and 20 mmol  $\text{CuCN}$  in dry DMF (60 ml) was refluxed for 36 h. The cooled reaction mixture was added with a solution of  $\text{HCl}$  (10 ml),

FeCl<sub>3</sub> (21 g, 129.2 mmol), and water (150 ml). Then the mixture was heated at 70 °C for 0.5 h. After the reaction was complete, the mixture was extracted with CH<sub>2</sub>Cl<sub>2</sub> three times. Recrystallization from CHCl<sub>3</sub> and methanol gave pure cyano substituted compounds.

The mixture containing 15 mmol of the above crude products and NaN<sub>3</sub> (15 mmol), and NH<sub>4</sub>Cl (15 mmol) in 30 ml DMF was heated at 150 °C overnight. After cooling, the resulting mixture was poured into 400 ml water and acidified with 1 N HCl to pH ~ 2. The precipitated solid was collected by filtration, washed with water, and dried to give a white solid as the tetrazole intermediate.

Subsequently, a mixture of the above tetrazole derivatives (10 mmol) and 3-bromobenzoyl chloride (10 mmol) in dry pyridine was heated to reflux overnight. Then the mixture was quenched with dilute HCl (10 mL), extracted with CH<sub>2</sub>Cl<sub>2</sub>, and dried with anhydrous Na<sub>2</sub>SO<sub>4</sub>. Column chromatography of the crude mixture on silica gel (eluent: petroleum/EtOAc = 4:1) gave **5b**, **6b** or **7b** in moderate yields.

Then, oxadiazole-containing arylbromide (6 mmol), bis(pinacolato)diborane (1.828 g, 7.2 mmol), and KOAc (2.06 g, 21 mmol) were mixed together in a 100 ml flask. After degassing, dioxane (40 ml) was added to the mixture under flow of argon. Afterward, [Pd(dppf)Cl<sub>2</sub>] (150 mg, dppf = 1,1'-bis(diphenylphosphanyl)ferrocene) was added. The reaction mixture was kept at 85 °C overnight and then cooled to room temperature. The solvent was concentrated and the inorganic salt was dissolved completely after addition of water. After extracted with CH<sub>2</sub>Cl<sub>2</sub>, the combined organic layer was washed with brine and then dried over anhydrous Na<sub>2</sub>SO<sub>4</sub>. The crude product was purified by silica gel column chromatography (eluent: petroleum/EtOAc = 4:1) and recrystallized from ethanol to afford **5**, **6** or **7** in good yields.

**2-(3-bromophenyl)-5-(3-(3,6-di-*tert*-butyl-9*H*-carbazol-9-yl)phenyl)-1,3,4-oxadiazole (5b)**. White solid, 4.616 g, yield: 40% in three steps. <sup>1</sup>H NMR (300 MHz, CDCl<sub>3</sub>): δ 8.26 (s, 1H), 8.20 (s, 1H), 8.15 (d, *J* = 9.3 Hz, 1H), 8.09 (s, 2H), 8.01 (d, *J* = 7.8 Hz, 1H), 7.70-7.69 (m, 2H), 7.62 (d, *J* = 7.8 Hz, 1H), 7.43 (d, *J* = 8.7 Hz, 2H), 7.36 (d, *J* = 9.3 Hz, 1H), 7.33 (d, *J* = 9.3 Hz, 2H), 1.40 (s, 18H). <sup>13</sup>C NMR (75 MHz, CDCl<sub>3</sub>): δ 158.94, 158.24, 138.11, 133.98, 133.62, 129.51, 125.53, 125.39, 124.75, 124.47,

120.23, 120.06, 119.64, 118.61, 118.39, 117.86, 111.16, 103.77, 29.52, 26.79. Anal. calcd. for  $C_{34}H_{32}BrN_3O$  (%): C 70.59, H 5.58, N 7.26; Found: C 70.54, H 5.78, N 7.14. MS (ESI):  $m/z$  577 ( $M^+$ ).

**2-(3-(3,6-di-*tert*-butyl-9*H*-carbazol-9-yl)phenyl)-5-(3-(4,4,5,5-tetramethyl-1,3,2-dioxaborolan-2-yl)phenyl)-1,3,4-oxadiazole (5).** White solid, 3.375 g, yield: 90%.  $^1H$  NMR (300 MHz,  $CDCl_3$ ):  $\delta$  8.52 (s, 1H), 8.36 (s, 1H), 8.26 (d,  $J = 6$  Hz, 2H), 8.17 (s, 2H), 7.99 (d,  $J = 7.8$  Hz, 1H), 7.77 (d,  $J = 4.2$  Hz, 2H), 7.56 (d,  $J = 7.8$  Hz, 1H), 7.48 (d,  $J = 8.7$  Hz, 2H), 7.41 (d,  $J = 8.4$  Hz, 2H), 1.47 (s, 18H), 1.36 (s, 12H).  $^{13}C$  NMR (75 MHz,  $CDCl_3$ ):  $\delta$  160.49, 159.53, 138.82, 134.69, 134.48, 133.71, 128.64, 126.66, 125.36, 125.27, 124.03, 121.29, 120.95, 120.49, 119.43, 119.13, 118.72, 111.90, 104.64, 79.79, 30.31, 27.58, 20.43. Anal. calcd. for  $C_{40}H_{44}BN_3O_3$  (%): C 76.79, H 7.09, N 6.72; Found: C 77.01, H 6.83, N 6.75. MS (ESI):  $m/z$  625 ( $M^+$ ).

**3-(5-(3-bromophenyl)-1,3,4-oxadiazol-2-yl)-*N,N*-diphenylaniline (6b).** Off white powder, 4.203 g, yield: 45% in three steps.  $^1H$  NMR (300 MHz,  $CDCl_3$ ):  $\delta$  8.22 (s, 1H), 8.03 (d,  $J = 7.5$  Hz, 1H), 7.80 (s, 1H), 7.72 (d,  $J = 7.8$  Hz, 1H), 7.67 (d,  $J = 8.7$  Hz, 1H), 7.40 (d,  $J = 7.8$  Hz, 1H), 7.35 (t,  $J = 8.4$  Hz, 2H), 7.31-7.22 (m, 5H), 7.14- 7.05 (m, 5H).  $^{13}C$  NMR (75 MHz,  $CDCl_3$ ):  $\delta$  160.00, 158.47, 144.05, 142.46, 129.88, 125.92, 125.36, 124.86, 121.93, 120.95, 120.73, 119.95, 118.92, 118.36, 116.54, 115.90. Anal. calcd. for  $C_{26}H_{18}BrN_3O$  (%): C 66.68, H 3.87, N 8.97; Found: C 67.02, H 4.22, N 8.98. MS (ESI):  $m/z$  467 ( $M^+$ ).

***N,N*-diphenyl-3-(5-(3-(4,4,5,5-tetramethyl-1,3,2-dioxaborolan-2-yl)phenyl)-1,3,4-oxadiazol-2-yl)aniline (6).** White solid, 2.781 g, yield: 90%.  $^1H$  NMR (300 MHz,  $CDCl_3$ ):  $\delta$  8.47 (s, 1H), 8.21 (d,  $J = 6.9$  Hz, 1H), 7.97 (d,  $J = 7.5$  Hz, 1H), 7.87 (s, 1H), 7.76 (d,  $J = 7.2$  Hz, 1H), 7.54 (t,  $J = 7.5$  Hz, 1H), 7.41 (t,  $J = 8.7$  Hz, 1H), 7.31-7.21 (m, 5H), 7.14-7.09 (m, 5H), 7.07 (d,  $J = 7.2$  Hz, 1H), 1.37 (s, 12H).  $^{13}C$  NMR (75 MHz,  $CDCl_3$ ):  $\delta$  160.14, 160.11, 144.22, 142.75, 133.48, 128.57, 125.49, 125.17, 125.02, 123.93, 122.05, 120.48, 120.12, 119.02, 118.83, 116.91, 116.23, 79.75, 20.42. Anal. calcd. for  $C_{32}H_{30}BN_3O_3$  (%): C 74.57, H 5.87, N 8.15; Found: C 74.79, H 6.20, N 8.17. MS (ESI):  $m/z$  515 ( $M^+$ ).

**4-(5-(3-bromophenyl)-1,3,4-oxadiazol-2-yl)-*N,N*-diphenylaniline (7b).** Light green crystal, 3.756 g, yield: 40% in three steps:  $^1H$  NMR (300 MHz,  $CDCl_3$ ):  $\delta$  8.17 (s, 1H), 8.17 (d,  $J = 5.7$  Hz, 1H), 7.87 (d,

$J = 6.6$  Hz, 2H), 7.59 (d,  $J = 5.4$  Hz, 1H), 7.34 (t,  $J = 6.0$  Hz, 1H), 7.27-7.19 (m, 5H), 7.10-7.06 (m, 5H), 7.04 (d,  $J = 6.6$  Hz, 2H).  $^{13}\text{C}$  NMR (75 MHz,  $\text{CDCl}_3$ ):  $\delta$  159.50, 157.21, 145.72, 141.17, 128.98, 125.28, 124.33, 124.19, 122.76, 120.42, 119.92, 119.19, 117.72, 115.51, 110.21. Anal. calcd. for  $\text{C}_{26}\text{H}_{18}\text{BrN}_3\text{O}$  (%): C 66.68, H 3.87, N 8.97; Found: C 67.00, H 4.20, N 9.14. MS (ESI):  $m/z$  467 ( $\text{M}^+$ ).

***N,N*-diphenyl-4-(5-(3-(4,4,5,5-tetramethyl-1,3,2-dioxaborolan-2-yl)phenyl)-1,3,4-oxadiazol-2-yl)aniline (7)**. Off white powder, 2.720 g, yield: 88%.  $^1\text{H}$  NMR (300 MHz,  $\text{CDCl}_3$ ):  $\delta$  8.50 (s, 1H), 8.25 (d,  $J = 7.8$  Hz, 1H), 7.98 (d,  $J = 8.7$  Hz, 2H), 7.55 (t,  $J = 7.5$  Hz, 1H), 7.35- 7.30 (m, 5H), 7.18-7.16 (m, 5H), 7.13 (d,  $J = 7.8$  Hz, 3H), 1.37 (s, 12H).  $^{13}\text{C}$  NMR (75 MHz,  $\text{CDCl}_3$ ):  $\delta$  160.12, 159.55, 146.39, 142.14, 133.28, 128.41, 125.13, 125.05, 123.94, 123.58, 121.17, 119.91, 119.09, 116.57, 111.54, 79.73, 20.43. Anal. calcd. for  $\text{C}_{32}\text{H}_{30}\text{BN}_3\text{O}_3$  (%): C 74.57, H 5.87, N 8.15; Found: C 74.85, H 6.07, N 8.20. MS (ESI):  $m/z$  515 ( $\text{M}^+$ ).

## References:

- 1 Z. H. Li and M. S. Wong, *Org. Lett.* **2006**, 8, 1499.
- 2 H.-Y. Chen, C.-T. Chen and C.-T. Chen, *Macromolecules* **2010**, 43, 3613.
- 3 K. Rajesh, M. Somasundaram, R. Saiganesh and K. K. Balasubramanian, *J. Org. Chem.* **2007**, 72, 5867.
